# Supplementary material
Source: PubMed Central journal article supplement (PMC3393533)

**Supplemental Information for:**

**Vicriviroc Resistance Decay and Relative Replicative Fitness in HIV-1**

**Clinical Isolates Under Sequential Drug Selection Pressures**

Athe M.N. Tsibris<sup>1,2\*</sup>, Zixin Hu<sup>2,3</sup>, Roger Paredes<sup>4</sup>, Kay E. Leopold<sup>5</sup>, Opass Putcharoen<sup>1,6,7</sup>, Allison L. Schure<sup>3</sup>, Natalie Mazur<sup>5</sup>, Eoin Coakley<sup>8†</sup>, Zhaohui Su<sup>6‡</sup>, Roy M. Gulick<sup>9</sup>, Daniel R. Kuritzkes<sup>1,2</sup>

<sup>1</sup>*Brigham and Women's Hospital, Boston, MA, USA;* <sup>2</sup>*Harvard Medical School, Boston, MA, USA;* <sup>3</sup>*Massachusetts General Hospital, Boston, MA, USA ;* <sup>4</sup>*Fundacions irsiCaixa i Lluita contra la SIDA, Hospital Universitari Germans Trias i Pujol, Universitat Autònoma de Barcelona, Badalona, Catalonia, Spain;* <sup>5</sup>*Harvard University, Cambridge, MA, USA;* <sup>6</sup>*Harvard School of Public Health, Boston, MA, USA;* <sup>7</sup>*Division of Infectious Diseases, Department of Medicine, King Chulalongkorn Memorial Hospital, Chulalongkorn University, Bangkok, Thailand;* <sup>8</sup>*Monogram Biosciences, South San Francisco, CA, USA;* <sup>9</sup>*Weill Medical College, Cornell University, New York, NY, USA*

**Supplemental Figure S1.** Protein alignment of native weeks 0, 28 and 48 full-length envelopes. The proportion of conserved amino acid identity, relative to p07Jenv0, is displayed above the sequences in bar format. Dots represent amino acids that are identical in all sequences; dashes signify length polymorphisms.

Supplemental Figure 1.

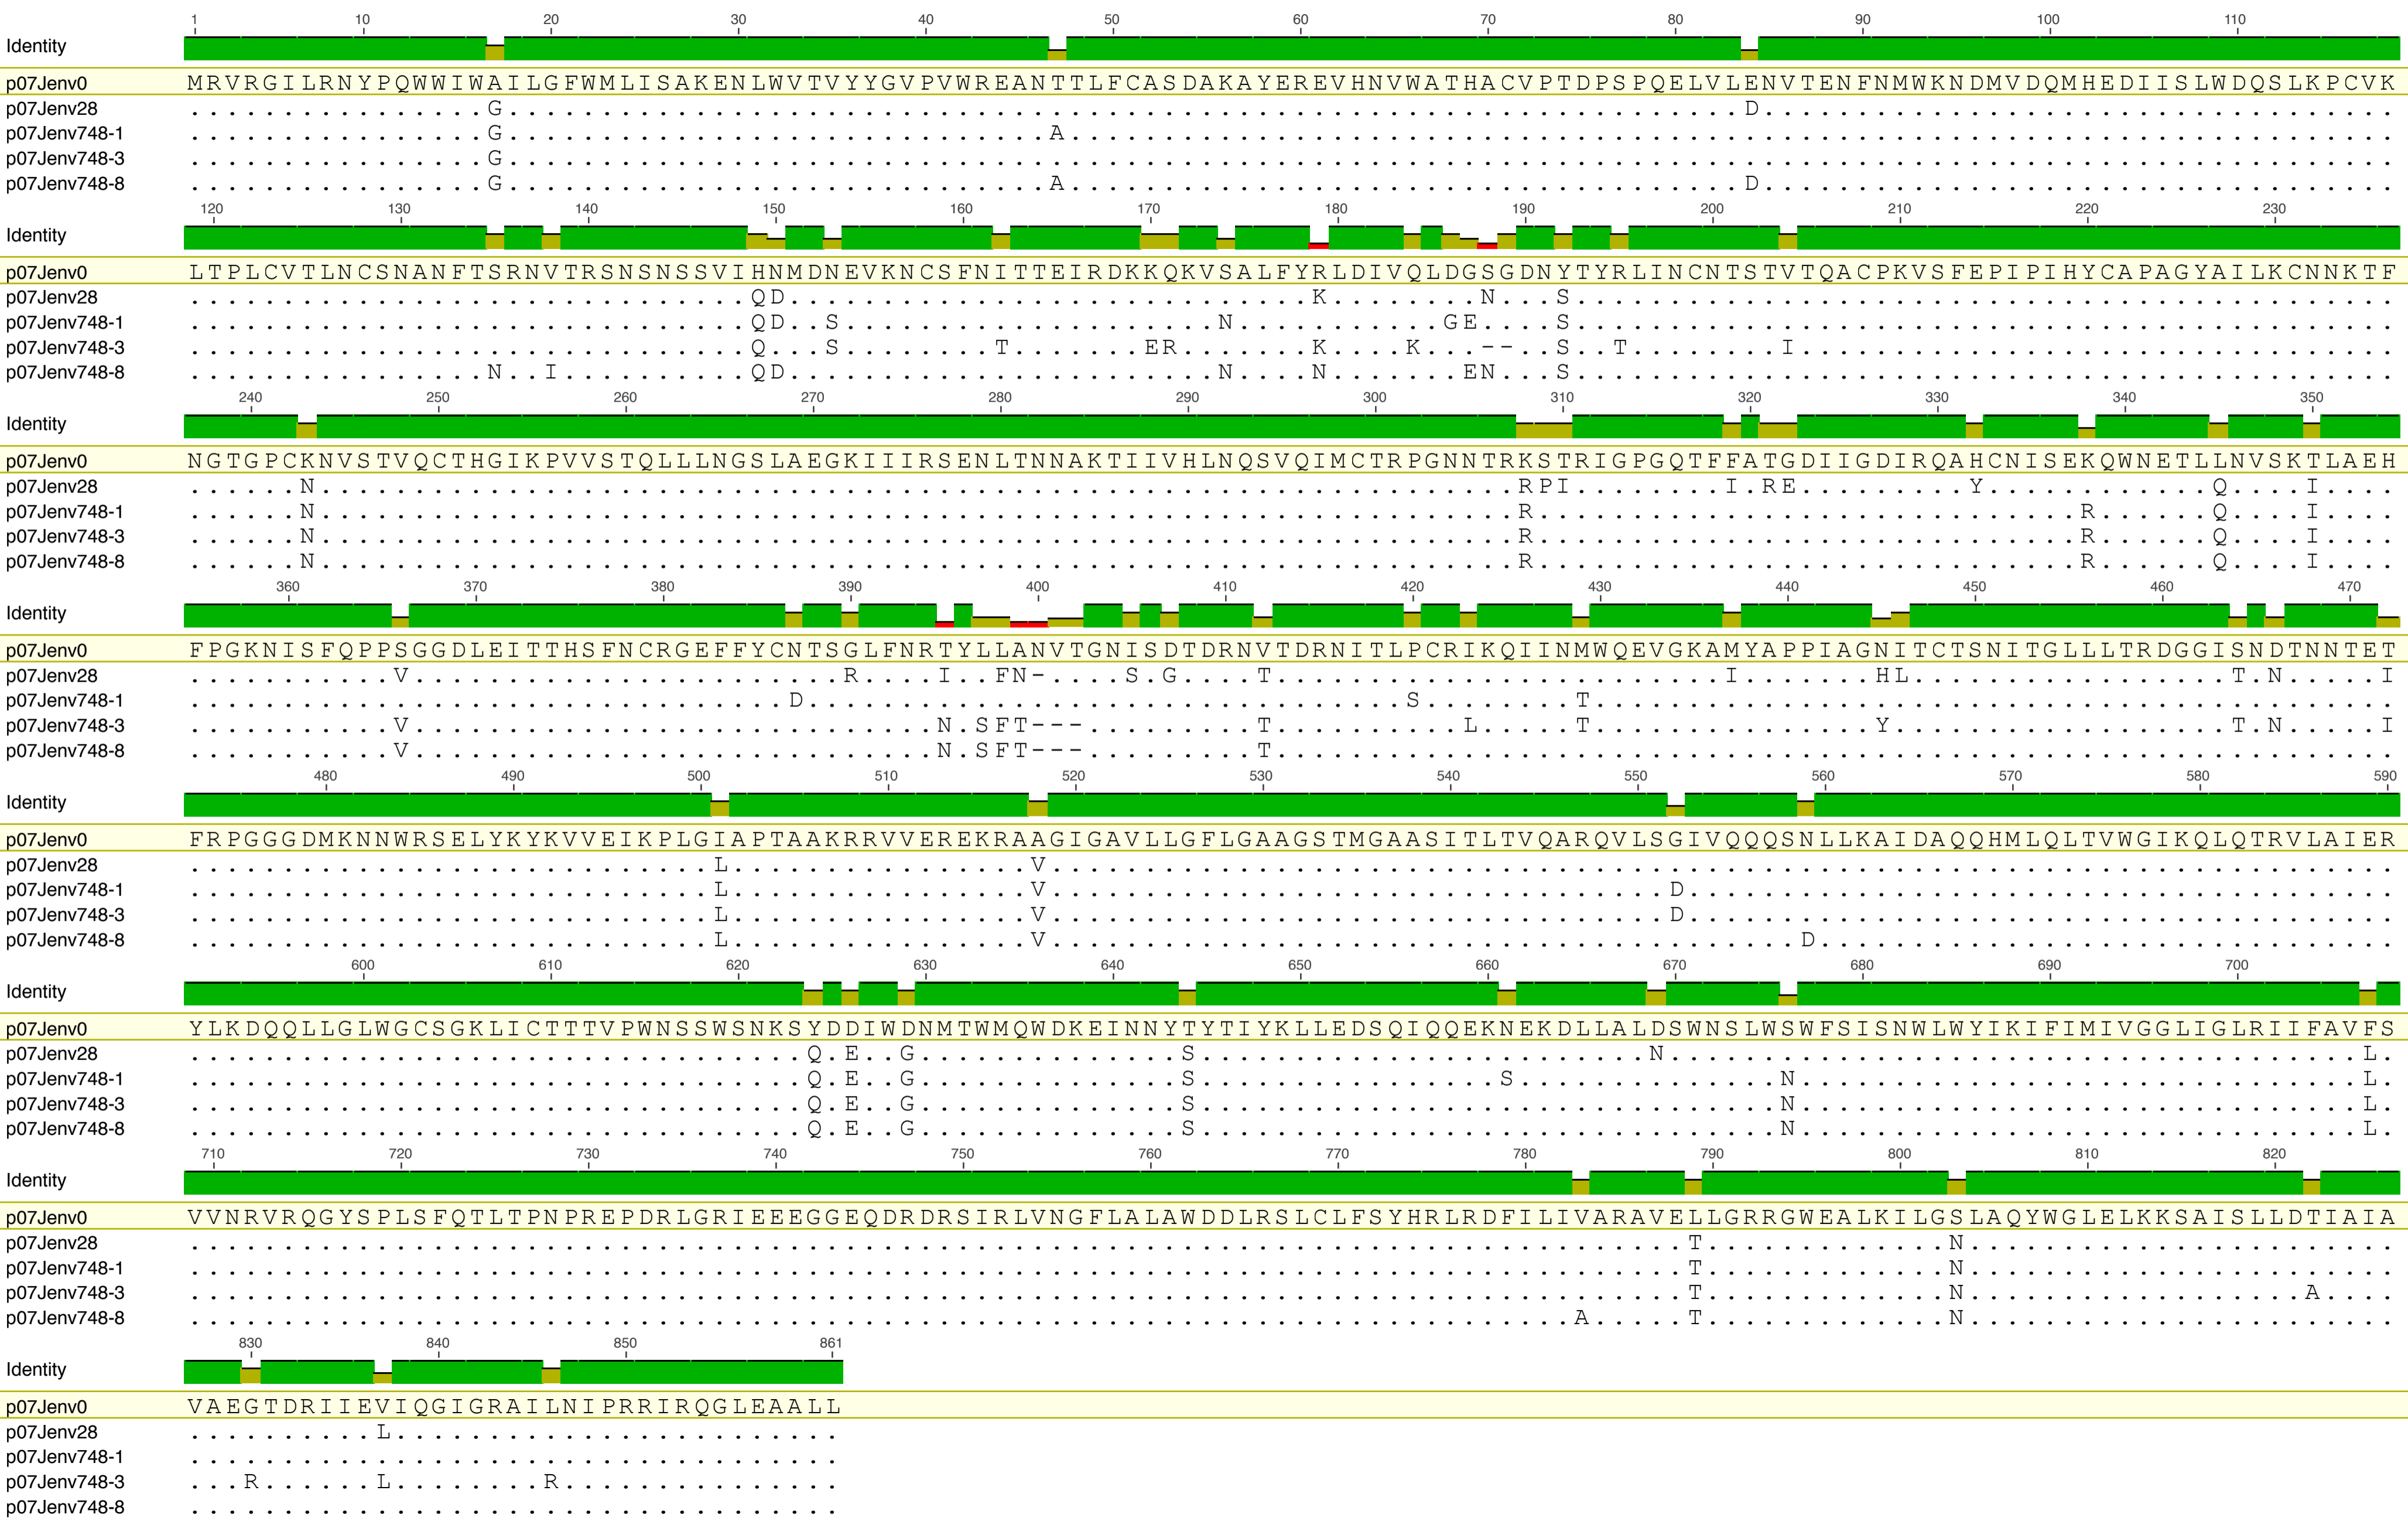

Supplement: supp_86.12.6416_FigS1.pdf [file supp_86.12.6416_FigS1.pdf]
